1 **Caspase-mediated cleavage of Murine Norovirus NS1/2 potentiates apoptosis and is required for**  
2 **persistent infection**

3

4 Bridget A. Robinson<sup>1</sup>, Broc T McCune<sup>2</sup>, A. Mack Peters<sup>1</sup>, and Timothy J. Nice<sup>1\*</sup>

5

6 <sup>1</sup>Department of Molecular Microbiology and Immunology, Oregon Health and Science University,  
7 Portland, Oregon, USA

8 <sup>2</sup>Department of Microbiology, University of Texas Southwestern Medical Center, Dallas, TX, USA

9

10

11 \*Correspondence: Timothy J. Nice, nice@ohsu.edu

12

13 **Short title:** Cleavage of MNV NS1/2 potentiates apoptosis and is required for persistence

14

15

16 **Abstract**

17 Human norovirus (HuNoV) is the leading cause of acute gastroenteritis and is spread by fecal shedding that  
18 can often persist for weeks to months after infection. Murine norovirus (MNV) is also shed persistently in  
19 the feces and provides a tractable model to study molecular mechanisms of enteric persistence. Previous  
20 studies have identified non-structural protein 1 (NS1) from the persistent MNV strain CR6 as critical for  
21 persistent infection in intestinal epithelial cells (IECs), but its mechanism of action remains unclear. We  
22 now find that the function of NS1 in promoting persistence is regulated by apoptosis. Following induction  
23 of apoptosis in infected cells, a minority of NS1 is cleaved from the precursor NS1/2 protein, and this  
24 cleavage is prevented by mutation of caspase target motifs. MNV strain CR6 with these mutations  
25 (CR6<sub>Δcasp</sub>) is profoundly compromised in infection of IECs and persistence in the intestine. Conversely,  
26 replication in tissues outside of the intestine, or in a cultured macrophage cell line, is unchanged, indicating  
27 that the requirement of NS1/2 cleavage is intestine-specific. Intriguingly, we also find that cleavage of CR6  
28 NS1/2 potentiates apoptosis, suggesting that regulation of cell death is a novel function of this viral protein.  
29 Together, these data indicate that the ability of NS1 to promote MNV persistence in IECs is regulated by  
30 host caspases, and suggest that potentiation of apoptosis plays a role in viral tropism in the intestine.

31

## 32 **Author Summary**

33 Human Norovirus infection is highly contagious and the most common cause of acute gastroenteritis.  
34 Norovirus can persist and be shed for months after infection, leading to continued outbreaks. There are  
35 many unanswered questions as to host and viral components of norovirus pathogenesis that can be addressed  
36 within the murine norovirus (MNV) model system. We previously identified a critical role for a viral  
37 protein, NS1, for intestinal persistence. Herein we describe how the regulation of NS1 is critical for  
38 persistent infection in intestinal epithelial cells, but is not required for acute infection of non-epithelial cells,  
39 or infection of tissues outside of the gut. Additionally, we demonstrate that NS1 is both regulated by the  
40 host cell death machinery, and also reciprocally regulates that machinery to promote cell death during MNV  
41 infection, and found that this is specific to persistent strain of MNV. Altogether these data identify a role  
42 for how NS1 in a new pathway involved in establishing a persistent norovirus infection in the intestine.

43

44

45

## 46 **Introduction**

47 Human norovirus (HuNoV) is the most common cause of epidemic gastroenteritis, and can be  
48 particularly dangerous for infants and the elderly [1,2]. Persistent viral shedding often occurs for weeks to  
49 months after acute infection, even in asymptomatic individuals [3,4], and is a potential source for continued  
50 outbreaks. Despite recent advances in culture systems to study HuNoV [5,6], there is still not an efficient  
51 *in vitro* or small animal system for investigating the molecular components of HuNoV infection.  
52 Fortunately, HuNoV and murine norovirus (MNV) share genotypic (ssRNA, positive-sense, ~7.5kb  
53 genome) and phenotypic (fecal-oral transmission, persistence in intestinal epithelial cells (IECs), and  
54 shedding in the feces) similarities, and utilization of the MNV model system has considerably advanced  
55 our molecular understanding of norovirus pathogenesis and persistence [7-9].

56 All noroviruses encode six non-structural proteins (NS1/2, NS3, NS4, NS5, NS6, and NS7)  
57 expressed upon cleavage of the open reading frame 1 (ORF 1) polyprotein by the viral NS6 protease [10]  
58 and two structural capsid proteins (VP1 and VP2) from ORFs 2 and 3 [11,12], respectively. MNV also has  
59 a fourth ORF that encodes a unique virulence factor not present in HuNoV [13]. Although the non-structural  
60 protein NS1/2 is not cleaved by the viral protease, it can be cleaved into two additional proteins (NS1 and  
61 NS2) [10,14] by the host protease, caspase 3 [10]. However, definitive data regarding the extent and  
62 consequences of such caspase cleavage are lacking.

63 Prior comparison of an acute and a persistent strain of MNV identified two viral proteins that are  
64 key components of MNV pathogenesis and persistence [15-17]: the major capsid protein (VP1) of the acute  
65 strain CW3 (VP1<sup>CW3</sup>) drives viral dissemination outside of the intestine, and NS1 of the persistent strain  
66 CR6 (NS1<sup>CR6</sup>) is critical for viral persistence in the intestine. Additional *in vivo* analyses demonstrated  
67 NS1<sup>CR6</sup> is absolutely required for infection of a specialized type of IEC, the tuft cell, identified as the cellular  
68 reservoir for MNV persistence [18]. Despite the differences in systemic spread and intestinal persistence,  
69 both CW3 and CR6 can infect macrophages, dendritic cells, T-cells, and B-cells *in vitro* and *in vivo*  
70 [6,19,20], and utilize the same cell-surface receptor, CD300lf [21,22]. Thus, VP1<sup>CW3</sup> and NS1<sup>CR6</sup> are

71 functioning via mechanisms other than receptor usage and replicative capacity to promote viral  
72 dissemination and persistence.

73 In addition to identified roles of viral proteins in norovirus pathogenesis, critical aspects of the host  
74 anti-viral response have also been identified. Particularly important is the multi-faceted interferon (IFN)  
75 response [23]. Type I ( $\alpha/\beta$ ) and type III ( $\lambda$ ) IFNs are both key players in the innate anti-viral response,  
76 primarily distinguished by the differential expression of their respective receptors [23]. The IFN- $\alpha/\beta$   
77 receptor is widely expressed on most cell types, whereas the IFN- $\lambda$  receptor is predominantly expressed on  
78 epithelial cells. In regards to MNV, IFN- $\alpha/\beta$  signaling is critical for control of MNV in myeloid cells,  
79 demonstrated by increased titers in macrophages that do not express the IFN- $\alpha/\beta$  receptor [19], the inability  
80 to control systemic MNV infection in mice that specifically lack IFN- $\alpha/\beta$  receptor expression on myeloid  
81 cells [24,25], and increased dissemination and lethality in mice that do not express the downstream signaling  
82 molecule, STAT1 [11]. In contrast to systemic spread, intestinal MNV infection is controlled by IFN-  
83  $\lambda$  signaling in IECs, and persistent infection can be cleared and prevented with IFN- $\lambda$  treatment [26,27].  
84 Interestingly, recent data suggests that NS1<sup>CR6</sup> may have a role in antagonizing the IFN- $\lambda$  response during  
85 intestinal infection of IECs [28], but how NS1<sup>CR6</sup> may function in this capacity and whether this is its sole  
86 function during persistent infection is unknown.

87 In addition to the IFN response, host cells also initiate apoptosis as a means of eliminating virus-  
88 infected cells. Correspondingly, viruses have evolved ways to hijack apoptotic machinery to their benefit.  
89 Apoptosis is a non-inflammatory, highly-regulated disassembly of the cell mediated by a family of cysteine  
90 proteases (caspases), and culminates in the release of the cellular contents within membranous vesicles  
91 (apoptotic bodies) that are taken up by professional phagocytes, as well as neighboring cells [29]. Because  
92 induction of apoptosis is an innate response to stress or infection, most viruses have developed ways to  
93 delay apoptosis in an effort to maximize viral progeny [30], exemplified by a number of large DNA viruses  
94 that encode viral homologs of the cellular anti-apoptotic protein, Bcl-2 [31]. Conversely, influenza virus  
95 actively induces apoptosis through manipulation of other Bcl-2 family proteins, which increases viral

96 replication and enhances pathogenesis [32,33]. In addition to manipulating apoptosis to prevent cell death  
97 or increase viral progeny, a number of viruses, including picornaviruses and flaviviruses, utilize ‘apoptotic  
98 mimicry’ as an alternate mode of egress and viral dissemination [34], and some viruses rely on apoptotic  
99 caspases to cleave viral proteins as an additional level of regulation [35-37]. Thus, apoptosis can be both  
100 anti-viral and pro-viral, making its regulation critical for viral pathogenesis.

101 HuNoV and MNV infection both induce apoptosis, as indicated by association with markers of  
102 apoptosis in infected intestinal tissue [38-40]. Thus, these viruses have likely also developed mechanisms  
103 to regulate apoptosis to promote infection. Apoptosis in MNV-infected myeloid cells includes  
104 downregulation of an inhibitor of apoptosis protein, survivin, and activation of caspases and other cysteine  
105 proteases [41,42]. Furthermore, independent expression of the MNV ORF1 polyprotein, which encodes  
106 the non-structural proteins (including NS1/2), is also sufficient to induce apoptosis [43], indicating one or  
107 more non-structural proteins could be promoting apoptosis during infection. Additional analyses of the  
108 non-structural proteins identified two functional caspase motifs in NS1/2, and demonstrated that the NS1/2  
109 protein can be cleaved by recombinant caspase 3 in a cell-free system [10]. Based on these published data,  
110 apoptosis during MNV infection may be facilitated by one or more non-structural proteins, and the virus  
111 may benefit from apoptotic signaling via utilization of a host caspase to regulate expression of NS1, the  
112 critical determinant for intestinal persistence [15].

113 Herein, we further delineate how NS1<sup>CR6</sup> functions to promote viral persistence by characterizing  
114 NS1/2 cleavage during MNV infection and its role in intestinal persistence. We demonstrate that at late  
115 times post-infection, concurrent with induction of apoptosis, a minority of total NS1/2 protein is cleaved in  
116 a caspase-dependent manner. Despite the relatively low proportion of total NS1/2 that is cleaved, our data  
117 demonstrate that NS1/2<sup>CR6</sup> cleavage is absolutely required for persistent infection in IECs, and this involves  
118 a function separate from IFN antagonism. Moreover, the cleavage of NS1/2<sup>CR6</sup> potentiates apoptotic cell  
119 death *in vitro*, suggesting controlled induction of apoptosis is a novel mechanism required for infection of  
120 IECs and intestinal persistence.

121

122

## 123 **Results**

124 **Host caspases cleave NS1/2 at late times post-infection.** Previous cell-free studies identified two  
125 functional caspase motifs (DKAD<sup>121</sup> and DAMD<sup>131</sup>) within NS1/2 that are cleaved by host caspase 3 [10]  
126 (Fig 1A), however, the necessity and utility of these sites during viral infection was unknown. Therefore,  
127 to assess the role of NS1/2 cleavage during viral persistence, we mutated these sites (D<sub>121</sub>G and D<sub>131</sub>G)  
128 within the persistent MNV strain, CR6, and named this virus CR6<sub>Δcasp</sub> (Fig 1B). Analyses of viral protein  
129 expression during MNV infection of BV2 cells demonstrates cleavage of a minority of total NS1/2 protein  
130 at late times post-infection with both an acute (CW3) and persistent (CR6) strain of MNV (Fig 1C).  
131 Cleavage of NS1/2 did not occur in CR6<sub>Δcasp</sub>-infected cells, demonstrating that it is dependent on the caspase  
132 motifs (Fig 1C), and, importantly, these mutations did not disrupt overall expression of full-length NS1/2  
133 protein. To determine whether host caspases are responsible for NS1/2 cleavage, cells were treated at 10h  
134 post-infection (PI) with a pan-caspase inhibitor, ZVAD-fmk, and indeed, the ~28kDa NS2 protein was no  
135 longer detected in infected cells at late times post-infection (Fig 1D). The ~18kDa NS1 protein was  
136 inconsistently detected in cells via western blot and may be a technical result of the small amounts of overall  
137 NS1/2 that get cleaved during infection. Together, these data demonstrate that a small portion of total NS1/2  
138 protein is cleaved by host caspases at relatively late times post-infection with MNV.

139

140 **Cleavage of NS1/2 is not required for viral replication *in vitro*.** The abundance of full-length NS1/2  
141 following infection with CR6<sub>Δcasp</sub> indicated that viral protein production was not dependent on these  
142 cleavage motifs (Fig 1C, D). To further assess whether NS1/2 cleavage is necessary for production of  
143 infectious virus, we compared plaque forming units (PFU) produced from cell cultures infected with CR6  
144 vs. CR6<sub>Δcasp</sub> over a 48h time course. Inhibition of NS1/2 cleavage did not significantly impair CR6  
145 replication in BV2 cells (Fig 2A), or within wildtype (WT) bone-marrow derived macrophages (BMDCs)  
146 (Fig 2C).



147 Our *in vivo* analyses discussed in the following section aimed to assess the role of NS1/2 cleavage  
148 on systemic replication as well as intestinal replication of MNV; therefore, we generated CR6 and CR6 $\Delta$ casp  
149 viral strains that could spread systemically due to chimeric expression of VP1<sup>CW3</sup> (Fig 1B) [15]. We  
150 performed growth curves using these capsid chimeras in parallel with growth curves for CR6 and CR6 $\Delta$ casp  
151 described above. *In vitro* growth kinetics in BV2 cells and WT BMDCs displayed minimal differences  
152 between CR6-VP1<sup>CW3</sup> and CR6 $\Delta$ casp-VP1<sup>CW3</sup> (Fig 2B, D). The minor, yet significant, decrease in peak titers  
153 of CR6 $\Delta$ casp-VP1<sup>CW3</sup> compared to CR6-VP1<sup>CW3</sup> in WT BMDCs but not in BV2 cells indicated NS1/2  
154 cleavage may serve a critical function specific to BMDC cultures. Recently published data suggests a role  
155 for NS1<sup>CR6</sup> in IFN antagonism, therefore, we assessed whether NS1/2 cleavage affected growth in BMDC  
156 cultures that are not responsive to IFN (*Stat1*<sup>-/-</sup> BMDCs). All the MNV strains we analyzed demonstrated  
157 higher peak titers in *Stat1*<sup>-/-</sup> BMDCs compared to WT BMDCs (Fig 2C-F), confirming the known inhibitory  
158 effect of IFNs on MNV replication [19], and the decreased replicative capacity of CR6 $\Delta$ casp-VP1<sup>CW3</sup> was no  
159 longer evident (compare Fig 2D to 2F). Altogether, these data indicate that NS1/2 cleavage is not necessary  
160 for viral replication but may play a role in counteracting the IFN response.

161

162 **NS1/2 cleavage is critical for persistence in the intestine.** To analyze whether NS1/2 cleavage impacts  
163 MNV infection of systemic and intestinal tissues *in vivo*, we perorally challenged WT B6 mice with 1e6  
164 PFU CR6, CR6 $\Delta$ casp, CR6-VP1<sup>CW3</sup> or CR6 $\Delta$ casp-VP1<sup>CW3</sup>, and analyzed tissues at three days post-infection  
165 (dpi) for the presence of infectious virus (Fig 3A-D). As expected, CR6 and CR6-VP1<sup>CW3</sup> were detected  
166 within the mesenteric lymph node (MLN), ileum (devoid of Peyer's patches), and colon, the eventual site  
167 of persistence (Fig 3A, B). Consistent with the high titers in intestinal tissue, we also detected infectious  
168 virus shed in the feces of mice infected with CR6 and CR6-VP1<sup>CW3</sup> at 3dpi (Fig 3C, D). However, in mice  
169 infected with CR6 $\Delta$ casp or CR6 $\Delta$ casp-VP1<sup>CW3</sup>, we rarely detected infectious virus in intestinal tissues (Fig 3A,  
170 B), nor being shed in the feces (Fig 3C, D), indicating that caspase cleavage of NS1/2 is required for  
171 promoting early infection of the intestine.

172 Although production of infectious virus was severely compromised in intestinal tissues of MNV-  
173 infected mice in the absence of NS1/2 cleavage, titers in the spleen were only modestly reduced and not  
174 significantly different at 3dpi in the absence of NS1/2 cleavage (Fig 3B), indicating that NS1/2 cleavage is  
175 not required for systemic spread. Similarly, we were able to detect MNV RNA within the Peyer's patches  
176 of animals infected with CR6 $\Delta$ casp-VP1<sup>CW3</sup> using the ultra-sensitive *in situ* RNA hybridization platform,  
177 RNAscope (Fig 3F), and this was not visibly different from CR6-VP1<sup>CW3</sup>-infected mice (Fig 3E-G).  
178 Together, these data suggest no requirement for NS1/2 cleavage during the initial infection in Peyer's  
179 patches or for subsequent systemic spread (Fig 3B, spleen).

180 To further verify that NS1/2 cleavage is not required for systemic MNV infection and pathogenesis,  
181 we infected *Stat1*<sup>-/-</sup> mice with either CR6-VP1<sup>CW3</sup> or CR6 $\Delta$ casp-VP1<sup>CW3</sup> (Fig 3H). Previous work  
182 demonstrated that VP1<sup>CW3</sup> is critical for systemic spread [15,17], and lethality in *Stat1*<sup>-/-</sup> mice [16,17,24].  
183 Accordingly, we found that peroral challenge with CR6-VP1<sup>CW3</sup> resulted in lethal MNV infection in *Stat1*<sup>-/-</sup>  
184 mice, and although NS1/2 cleavage is critical for efficient infection in the intestine, CR6 $\Delta$ casp-VP1<sup>CW3</sup>  
185 infection also resulted in 100% mortality in *Stat1*<sup>-/-</sup> mice (Fig 3H). As a control, we infected *Stat1*<sup>-/-</sup> mice  
186 with CR6, which persists, but does not result in lethal infection (Fig 3H) [15]. Overall, our characterization  
187 of acute infection demonstrates that NS1/2 cleavage is not required for systemic spread of MNV and is not  
188 necessary for lethal pathology in *Stat1*<sup>-/-</sup> mice. However, NS1/2 cleavage is specifically required for  
189 efficient MNV replication in the ileum (outside of Peyer's patches) and colon, the source of virus shed in  
190 the stool and the site of eventual persistence.

191 Due to limited detection of virus at 3dpi in the intestinal tissues of mice infected with CR6 $\Delta$ casp and  
192 CR6 $\Delta$ casp-VP1<sup>CW3</sup>, we predicted that these mutants would also fail to persist. Indeed, whereas CR6 or CR6-  
193 VP1<sup>CW3</sup> persisted in the ileum and colon at 21dpi (Fig 4A, B), and were shed in the stool (Fig 4C, D), we  
194 rarely detected persistent virus in any tissues from mice infected with CR6 $\Delta$ casp or CR6 $\Delta$ casp-VP1<sup>CW3</sup> (Fig 4).  
195 Altogether, these findings support a role for NS1/2 cleavage specifically within the intestinal tissue, and

196 temporally link the activity of NS1/2 cleavage to the first 3 days post-infection. Thus, NS1/2 cleavage is  
197 required for establishing an infection in the intestine and subsequent persistence.

198

199 **NS1/2 cleavage functions independently of IFN.** Due to the dominant role IFN- $\lambda$  plays in protection  
200 against persistent MNV infection of the intestine [26], and the potential role of NS1/2 cleavage in  
201 counteracting IFN signaling in BMDCs (Fig 2C, D compared to Fig 2E, F) [28], we sought to more  
202 thoroughly characterize CR6 $\Delta$ casp infection in the absence of IFN- $\lambda$  signaling. To this end, we infected WT  
203 or *Ifnlr1*<sup>-/-</sup> mice with CR6 or CR6 $\Delta$ casp and monitored shedding in the stool over time (Fig 5A, B), and  
204 persistence in the colon at 21dpi (Fig 5C, D). Additionally, to determine whether an early barrier to MNV  
205 infection could be overcome with increased infectious dose, we included an experimental group with 10-  
206 fold more CR6 $\Delta$ casp (1e7 PFU) in the inoculum. MNV was shed in all WT mice infected with CR6 beginning  
207 on day 3 and continuing until the experimental endpoint, day 21. Consistent with the protective role of IFN-  
208  $\lambda$ , *Ifnlr1*<sup>-/-</sup> mice infected with CR6 shed greater than 10-fold more virus relative to WT mice (Fig 5A, B),  
209 and CR6 was detected in colon tissue at levels commensurate with fecal shedding at 21dpi (Fig 5C, D). In  
210 contrast, we were unable to detect shedding of CR6 $\Delta$ casp at any time from WT or *Ifnlr1*<sup>-/-</sup> mice (Fig 5A, B).  
211 These data indicate that NS1/2<sup>CR6</sup> cleavage promotes persistent infection via a novel mechanism separate  
212 from IFN antagonism.

213

214 **Cleavage of NS1/2 is critical for MNV infection of intestinal epithelial cells.** Our preceding data  
215 demonstrated that disrupting NS1/2 cleavage leads to an overall reduction of infectious virus produced in  
216 intestinal tissues of either WT (Figs 3, 4) or *Ifnlr1*<sup>-/-</sup> (Fig 5) mice. Therefore, to attain a more thorough  
217 understanding of the role of NS1/2 cleavage on cellular tropism, we infected WT or knockout mice with  
218 CR6 or CR6 $\Delta$ casp and analyzed infection of IECs at 3dpi by flow cytometry and RNAscope (Fig 6). We  
219 concurrently quantified MNV infection of Peyer's patches by qPCR to enable contextualization of the IEC  
220 infection data. We were able to detect viral RNA in Peyer's patches in the majority of CR6-infected mice

221 and ~50% of CR6<sub>Δcasp</sub>-infected mice (Fig 6A). Although CR6<sub>Δcasp</sub> infection of Peyer's patches was less  
222 robust than that of CR6, these data confirm that NS1/2 cleavage is not strictly required for initial infection  
223 of non-epithelial cells during acute infection (Figs 3E-F, 6A). This detectable but reduced infection by  
224 CR6<sub>Δcasp</sub> was observed in mice deficient in IFN-λ receptor (*Ifnlr1*<sup>-/-</sup>; LRKO), doubly-deficient in IFN-λ and  
225 IFN-α/β receptors (*Ifnlr1*<sup>-/-</sup>/*Ifnar1*<sup>-/-</sup>; DKO), as well as receptor-sufficient controls (WT) (Fig 6A),  
226 suggesting NS1/2 cleavage amplifies infection in Peyer's Patches.

227 To assess the requirement of NS1/2 cleavage in IEC infection, intestinal tissue devoid of Peyer's  
228 patches was mechanically and enzymatically stripped to obtain a single cell suspension and stained for  
229 CD45 and EpCAM as markers of immune cells and epithelial cells, respectively. The presence of MNV  
230 infection was detected via dual intracellular staining using two distinct antibodies to NS1/2 in mice infected  
231 with CR6 or CR6<sub>Δcasp</sub> (Fig 6B, C). We analyzed IEC infection in the same mice as in Fig 6A, including  
232 knockouts and littermate controls. Regardless of genotype, we only detected IEC infection when mice were  
233 infected with CR6, but not CR6<sub>Δcasp</sub> (Fig 6B, C). Additionally, tissue sections were examined via  
234 RNAscope, and we reproducibly detected CR6 infection of IECs (Fig 6D, E), as well as non-epithelial cells  
235 in the lamina propria (Fig 6E) but were unable to find evidence for CR6<sub>Δcasp</sub> infection of IECs at 3dpi (Fig  
236 6F). These data demonstrate the necessity of NS1/2 cleavage for CR6 infection of IECs, the cellular  
237 reservoir of MNV persistence. Furthermore, the profound absence of CR6<sub>Δcasp</sub> in IECs would translate to  
238 a loss of IEC-dependent viral amplification and may explain the reduced titers in Peyer's patches (Fig 6A)  
239 and MLN (Fig 3A, B) during acute infection. Altogether, our data demonstrate that eliminating IFN  
240 signaling is not sufficient to rescue CR6<sub>Δcasp</sub> infection of IECs (Figs 5 and 6), indicating that cleavage of  
241 NS1/2 functions to promote persistent infection of IECs by a mechanism independent of the IFN-λ  
242 response.

243

244 **NS1/2 cleavage promotes MNV-induced apoptosis.** We next sought to identify an IFN- $\lambda$ -independent  
245 cellular response altered by NS1/2 cleavage. Because apoptotic-associated caspases have been implicated  
246 in cleavage of NS1/2 (Fig 1) [10], and NS1/2 cleavage is critical for developing a persistent MNV infection  
247 (Figs. 4, 5), we postulated that apoptosis may be altered by NS1/2 cleavage to promote persistent infection  
248 in the gut. Consistent with this hypothesis, we found that CR6 induced significantly more apoptosis in BV2  
249 cells compared to CR6 $\Delta$ casp (Fig 7). This included an increase in the active form of caspase 3 (Fig 7A, B)  
250 and an increase in PARP cleavage (Fig 7A), a known target of activated caspase 3 [44]. The increase in  
251 caspase 3 activity at 18hpi (Fig 7B) was not simply due to increased infection in CR6-infected cultures, as  
252 there were similar levels of ProPol detected in all infection conditions (Fig 7C). We also measured a  
253 significant increase in cells expressing phosphatidylserine on the external plasma membrane via Annexin  
254 V staining in CR6-infected cells (Fig 7E-G). Similarly, there was also an increase in these apoptotic  
255 markers following infection with CR6-VP1<sup>CW3</sup> compared to CR6 $\Delta$ casp-VP1<sup>CW3</sup> (Fig 7D, E-H). Furthermore,  
256 in support of the hypothesis that NS1/2<sup>CR6</sup> cleavage promotes apoptosis in a manner that is specific for  
257 persistence, the acute strain of MNV, CW3, induced less apoptosis in all our analyses (Fig 7), despite  
258 demonstrating NS1/2 cleavage (Fig 1C). Interestingly, CR6-VP1<sup>CW3</sup> infection resulted in increased cell  
259 permeability and death relative to CR6 at 17hpi (Fig 7E, H), consistent with our separate findings that  
260 VP1<sup>CW3</sup> drives lytic cell death and inflammatory cytokine production (Jacob VanWinkle, et al, manuscript  
261 under review). However, even in the context of increased cell lysis associated with VP1<sup>CW3</sup>, we still  
262 observed a significant decrease in Annexin V-positivity in the absence of NS1/2<sup>CR6</sup> cleavage (Fig 7F, H),  
263 suggesting NS1/2 cleavage is still promoting apoptosis even in the context of lysis and inflammation driven  
264 by VP1<sup>CW3</sup>. Together with the preceding data, these findings suggest that potentiation of apoptotic cell  
265 death by caspase-mediated cleavage of NS1/2 is critical for determining IEC tropism and persistence.

266

267

## 268 Discussion

269 Herein, we demonstrate that caspase-mediated cleavage of the nonstructural protein, NS1/2, is  
270 critical for developing a persistent MNV infection. We engineered and characterized a strain of MNV in  
271 which NS1/2 is not cleaved (CR6<sub>Δcasp</sub>), and our *in vitro* and *in vivo* analyses demonstrate that NS1/2  
272 cleavage is not required for viral replication in myeloid cells but is necessary for infection of IECs, the  
273 eventual site of persistence. Furthermore, our data indicate that NS1/2 cleavage potentiates apoptosis,  
274 suggesting apoptosis is a critical aspect of establishing a persistent MNV infection.

275 NS1/2 was not previously known to play a role in cell death during MNV infection, but is required  
276 for viral replication beginning at the earliest stages of replication complex assembly. Norovirus replication  
277 occurs in the cytoplasm on cellular membranes with a variety of organelle markers [45], and occurs near  
278 membranous vesicles [19,45]. MNV NS1/2 targets to the endoplasmic reticulum (ER) [46,47] and promotes  
279 replication via membrane re-organization and through an interaction with the vesicle-associated membrane  
280 protein, VAPA [48,49]. Similarly, HuNoV NS1/2 also interacts with VAPA, targets to vesicles, and  
281 disrupts vesicle trafficking when ectopically expressed [49]. Our data indicate that the functions of NS1/2  
282 during viral replication remain intact when the caspase cleavage sites are mutated, and viral replication  
283 occurs normally (Fig 2). NS1/2 cleavage only occurs after the bulk of viral replication has completed  
284 indicating that its role in promoting apoptosis, IEC infection, and persistence involves relatively late events  
285 in the viral lifecycle.

286 The last step of the viral replication cycle is egress. Therefore, NS1/2 cleavage and associated  
287 apoptotic death may be important for regulating release of viral progeny. How noroviruses are released  
288 from infected cells is not well understood, but infection of macrophages and DCs does result in cell lysis  
289 [19], and non-enveloped viruses generally rely on cell lysis to release newly assembled virions. Death by  
290 apoptosis may alter this process by reducing lytic virion release and favoring retention of virions within  
291 cellular membranes. Indeed, a number of non-enveloped viruses utilize vesicle-associated egress as a  
292 means of evasion from immune detection, and vesicles with exposed phosphatidylserine allow for

293 phagocytic uptake of novel target cells that may not express the viral receptor [50,51]. This type of vesicle  
294 egress, known as ‘apoptotic mimicry’, is also utilized by enveloped viruses which can incorporate  
295 phosphatidylserine directly into their viral envelope [34]. Viruses, or virus-filled vesicles, decorated with  
296 phosphatidylserine can inhibit IFN responses via activation of Tyro3/Axl/Mer (TAM) receptor tyrosine  
297 kinases when phagocytosed by dendritic cells (DCs) [52], which would allow more efficient viral  
298 replication in those target cells. Thus, vesicular egress has the potential to dramatically change the outcome  
299 of infection.

300 Previous work identified CD300lf as the MNV receptor [21], and accordingly, it is expressed on  
301 MNV target cells, including myeloid cells and a specialized IEC subtype, tuft cells. Tuft cells are a rare  
302 cell type in the intestinal epithelium and are dispersed among non-tuft IECs [53]. Interestingly, our analyses  
303 often found intestinal villi with multiple, adjacent epithelial cells infected (Fig 6E) even though MNV  
304 infection has not been shown to alter numbers of tuft cells in the intestine [18]. These findings raise the  
305 possibility of receptor-independent transfer of MNV to neighboring IECs, which could be mediated by  
306 apoptosis or vesicular egress regulated by NS1/2 cleavage. Future work will be necessary to determine  
307 whether vesicle-associated egress occurs during norovirus infection and whether it is required for viral  
308 persistence.

309 Regular maintenance of the highly proliferative intestinal epithelium means differentiated epithelial  
310 cells have a short lifespan, and undergo a specialized form of apoptotic cell death (anoikis) triggered as the  
311 cell detaches from the basal membrane and is shed into the lumen [54]. Specific Bcl-2 family proteins are  
312 critical players in anoikis [55,56], and display increased expression as IECs transit up the villus [56]. It is  
313 possible cleavage of NS1/2 (and perhaps NS1 directly) interferes with Bcl-2 family proteins as a means of  
314 altering the kinetics of the highly-regulated pathways that control apoptosis within differentiated IECs.  
315 Interestingly, similar to NS1/2 cleavage promoting apoptosis during infection, some Bcl-2 proteins (e.g.  
316 Bid) are also regulated via cleavage, in which the truncated version is the active, pro-apoptotic form of the

317 protein [57]. It will be interesting to examine whether NS1/2 interactions with the apoptotic machinery  
318 plays a role in maintaining IEC infection.

319 Death by apoptosis could also function to avoid immune detection and to limit inflammation  
320 associated with cell lysis. Virus production that results from cell lysis would promote inflammatory signals  
321 to alert the host of an infection. Thus, promotion of an apoptotic cell death in myeloid cells, mediated by  
322 NS1/2<sup>CR6</sup> cleavage (Fig 7), would limit inflammation and benefit persistence. In addition to professional  
323 phagocytes, phagocytosis by non-professional phagocytes (e.g. epithelial cells) is critical for efficient  
324 clearance of apoptotic cells, and for limiting inflammation in tissues with high cellular turnover [58].  
325 Specifically, in a mouse model of colonic injury, phagocytic uptake of apoptotic cells by IECs was sufficient  
326 for limiting inflammation in the colon [59], and phagocytosis mediated by epithelial cells is similarly critical  
327 for reducing inflammation in lung tissue [60] and mammary glands [61]. Thus, intestinal infection that  
328 promotes apoptotic death and the phagocytic uptake by IECs would limit host detection and provide a non-  
329 inflammatory environment that would allow more efficient infection of IECs and benefit MNV persistence.  
330 Regardless of whether apoptotic death limits inflammation or functions by another mechanism, our studies  
331 here have suggested potentiation of apoptosis following cleavage of NS1/2 as a new pathway critical for  
332 sustained infection of IECs and expanded our understanding of the requirements for viral persistence in the  
333 intestine.

334

335



## 336 **Materials and Methods**

### 337 **Cells, virus, and plaque assays**

338 BV2 cells (gift from Herbert Virgin IV, Washington University, St. Louis, MO), a mouse microglial  
339 cell line [62], were maintained in DMEM (Life Technologies, ThermoFisher, Carlsbad, CA) with 5% fetal  
340 bovine serum (FBS) (VWR Seradigm, Radnor, PA), 1X Penicillin/Streptomycin/Glutamine (P/S/G)  
341 solution, and 10mM HEPES. For bone-marrow derived dendritic cells (BMDCs), bone marrow was  
342 isolated from the long bones of each hind leg of either a WT or *Stat1*<sup>-/-</sup> mouse and suspended in RPMI (Life  
343 Technologies). Red blood cells were lysed using red blood cell lysis solution (Sigma, St Louis, MO) and  
344 remaining bone marrow cells were cultured in RPMI with 10% FBS, 1X P/S/G solution, 10mM HEPES,  
345 1X Sodium Pyruvate, 1X non-essential amino acids, and 20ng/mL GM-CSF obtained from supernatants of  
346 GM-CSF-secreting cells (J558L, [63]). After seven days of culture (37C, 5% CO<sub>2</sub>), non-adherent cells were  
347 collected, infected with indicated MNV strains (MOI = 1), and maintained without GM-CSF. For indicated  
348 experiments, ZVAD-fmk (Cell Signaling Technology [CST], Danvers, MA) was re-suspended in DMSO  
349 and added to cells at 70μM. As a positive control for apoptosis assays, cells were treated with 1uM  
350 staurosporine (SS) (CST) for 3.5h, at 37C.

351 CR6<sub>Δcasp</sub> MNV was generated using site directed mutagenesis as previously described [15] with the  
352 following primers: CR6 D<sub>121</sub>G, 5'- GCCTAAGGAAGATAAAGCC**GGT**GCGCCCTCCCATGCG and  
353 CR6 D<sub>131</sub>G, 5'-TGCGGAGGACGCCATG**GGT**GCAAGGGAGCCCATAATTGG. The targeted residue  
354 is underlined with the mutation in bold. Correct mutations were verified via sanger sequence analysis.

355 MNV stocks were generated from plasmids, as described [17]. Briefly, plasmids encoding viral  
356 genomes of parental CW3 (GenBank accession no. [EF014462.1](#)), parental CR6 (GenBank accession  
357 no. [JQ237823](#)), CR6-VP1<sup>CW3</sup> [15,17] and the two NS1/2<sub>Δcasp</sub> viral genomes generated herein, were  
358 individually transfected into 293T cells (ATCC #CRL-3216). Forty-eight hours post-transfection, cells  
359 were frozen, thawed, vortexed, and spun at 3,000xg to remove large debris. Supernatants were expanded

360 by two passages at MOI <0.05 in BV2 cells, and p2 virus supernatant was filtered (0.45um), concentrated  
361 by ultra-centrifugation through a 30% sucrose cushion, and titered via plaque assay.

362 Plaque assays were performed in BV2 cells, similar to previously described methods [15]. Briefly,  
363 BV2 cells were grown in 6well plates, infected with serial dilutions of each sample (500ul per well, 1h, RT,  
364 on a rocking platform), after which the inoculum was removed and cells were overlaid with 1%  
365 methylcellulose in complete DMEM. At 2-3d post-overlay, cells were fixed and stained with 20% EtOH /  
366 0.1% crystal violet.

367

### 368 **Mice, infections, and tissue collection**

369 *Stat1*<sup>-/-</sup> (*Stat1*<sup>tm1Dlv</sup>) mice were originally obtained from the Jackson Laboratories (stock #012606).  
370 *Ifnlr1*<sup>-/-</sup> (generated from *Ifnlr1*<sup>tm1a(EUCOMM)Wtsi</sup>) and *Ifnar1*<sup>-/-</sup> (*Ifnar1*<sup>tm1Agt</sup>) were originally obtained from  
371 Washington University in St. Louis. *Ifnlr1*<sup>-/-</sup> and *Ifnar1*<sup>-/-</sup> were bred to generate *Ifnlr1*<sup>-/-</sup>/*Ifnar1*<sup>-/-</sup> mice (DKO)  
372 and *Ifnlr1*<sup>+/-</sup>/*Ifnar1*<sup>+/-</sup> (Dhet). Dhet and DKO crossbreeding yielded littermate mice deficient in neither  
373 (Dhet), both (DKO), or a single (*Ifnlr1*<sup>+/-</sup>/*Ifnar1*<sup>-/-</sup> or *Ifnlr1*<sup>-/-</sup>/*Ifnar1*<sup>+/-</sup>) IFN receptor gene(s); these  
374 littermates were used for experiments to control for variability between litters.

375 All mice (7-9weeks old) were perorally infected with 1e6 PFU in a 25μL volume administered by  
376 pipet, with the exception of experiments in Figure 6 where 1e6 or 1e7 PFU (as indicated in figure) was  
377 administered by oral gavage in a 100μL volume. An equal proportion of males and females were  
378 maintained among experimental groups to mitigate results due to any unidentified sex-dependent variables.  
379 Same-sex mice, infected with the same MNV strain, were often co-housed for acute infection analyses (less  
380 than three days), but singly-housed for extended experiments to prevent continued transmission between  
381 animals.

382 Tissue samples, or a single fecal pellet, were collected in 2ml cryovials with 1mm zirconia/silica  
383 beads (Biospec, Bartlesville, OK), frozen in a dry ice/EtOH bath and stored at -80C. For plaque assay or

384 RT-qPCR analyses, either 1ml DMEM or 1ml RiboZol (VWR) was added, respectively, and tissues were  
385 homogenized via bead-beating (1min, RT) prior to continued analysis.

386

### 387 **Ethics Statement**

388 All mice were bred on C57BL/6 background and maintained in specific-pathogen-free barrier  
389 facilities at Oregon Health & Science University under animal protocols approved by the institutional  
390 animal care and use committee at Oregon Health & Science University (protocol # IP00000228) according  
391 to standards set forth in the *Animal Welfare Act*.

392

### 393 **RNA, cDNA, and RT-qPCR**

394 RNA from tissues was extracted via RiboZol (VWR) protocols, and RNA from cells was extracted  
395 with the ZR Viral RNA kit (Zymoresearch, Irvine, CA). DNA contamination was removed with Turbo  
396 DNase (ThermoFisher), and 1ug of RNA was used to generate cDNA with the ImpromII reverse  
397 transcriptase (Promega, Madison, WI). Quantitative PCR was performed using PerfeCTa qPCR FastMix  
398 II (QuantaBio, Beverly, MA), and the following oligo/probes were used for detection: MNV genomic  
399 RNA - Forward primer CACGCCACCGATCTGTTCTG, Reverse primer GCGCTGCGCCATCACTC,  
400 and Probe TGCGCTTTGGAACAATGG; RPS29 - Forward primer GCAAATACGGGCTGAACATG,  
401 Reverse primer GTCCAACCTAATG AAGCCTATGTC, and Probe CCTTCGCGTACTGCCGGAAGC.

402

### 403 **Cell Lysates and Western blot**

404 BV2 cells were grown and infected in 12well plates (2 e5 cells/well). Cells were lifted with  
405 trypsin/0.25% EDTA (Gibco, ThermoFisher), washed with 1X cold PBS, resuspended in 100ul NP40 lysis  
406 buffer (Alfo Aesar, Havervill, MA) with protease inhibitor cocktail (Sigma, St Louis, MO), incubated on  
407 ice (15min with intermittent mixing), cleared via centrifugation (1min, 4C, full-speed), and diluted 1:1 with  
408 2x SDS loading buffer (0.125 M Tris [pH 6.8], 4% SDS, 20% glycerol, 0.004% bromophenol blue, 10%  $\beta$ -

409 mercaptoethanol). Lysates were run on Novex Tris-Glycine gels (ThermoFisher), transferred to 0.2 $\mu$ m  
410 PVDF (BioRad, Hercules, CA), blocked with 5% nonfat dry milk, and probed with the following antibodies  
411 (Ab): caspase 3 pAb (CST), PARP pAb (CST),  $\beta$ -Actin pAb (Invitrogen), MNV NS1/2 pAb (a gift from  
412 Dr. Vernon Ward, U. of Otago, Australia), or MNV ProPol pAb (a gift from Dr. Kim Green, NIH). Signal  
413 was detected using goat,  $\alpha$ -rabbit IgG-HRP (Jackson ImmunoResearch), developed with ECL substrate  
414 (Pierce, ThermoFisher), and imaged with an ImageQuant LAS4000 (GE Healthcare, Little Chalfont, UK).

415

#### 416 **Intestinal epithelial cell collection**

417 Epithelial fractions were prepared by non-enzymatic stripping as previously described [24]. Mice  
418 were euthanized and distal small intestine, cecum, and colon (regions of highest MNV replication) were  
419 isolated. Peyer's patches were removed from small intestine and intestinal tissues were incubated in  
420 stripping buffer (10% bovine calf serum, 15 mM HEPES, 5 mM EDTA, 5 mM dithiothreitol [DTT] in PBS)  
421 with shaking for 20 min at 37°C. The dissociated cells were collected as the epithelial fraction, consisting  
422 predominantly of IECs and directly used for flow cytometry.

423

#### 424 **Surface and intracellular staining and flow cytometry**

425 BV2 cells were trypsinized and washed once with 1X PBS, stained with the amine-reactive viability  
426 dye, Zombie Aqua (Biolegend, San Diego, CA) (20min, on ice), washed once with cold 2% FBS/PBS,  
427 washed once with cold Annexin V binding buffer (CST), and stained with Annexin V-FITC (CST) (15min,  
428 RT). Cells were immediately analyzed via flow cytometry on an LSR Fortessa (Becton Dickinson [BD],  
429 Franklin Lakes, NJ) with FACSDiva software (BD), and data was analyzed using FlowJo software (FlowJo  
430 LLC, Ashland, OR).

431 IECs isolated as described above were stained with the Zombie Aqua viability dye (Biolegend), Fc  
432 receptors were blocked with purified CD16/CD32 pAb (clone93; Biolegend), and cells were probed for

433 surface markers, EpCAM (clone G8.8; Biolegend) and CD45 (clone 30-F11; Biolegend). Cells were  
434 subsequently fixed with 2% paraformaldehyde/PBS (10min, RT), and blocked/permeabilized in 0.2% Triton  
435 X/PBS with 2% normal goat serum (20min, RT). Fixed and permeabilized cells were probed for  
436 intracellular viral antigen with 2 distinct antibodies: Rabbit polyclonal anti-NS1/2 (a gift from Dr. Vernon  
437 Ward, U. of Otago, Australia) and mouse monoclonal anti-NS1 (clone CM79, a gift from Dr. Ian Clark, U.  
438 of Southampton, UK). These unconjugated antibodies were detected with anti-Rabbit Alexa Fluor 647  
439 (Molecular Probes, Eugene, OR), and anti-mouse Dylight 405 (Jackson ImmunoResearch), respectively.  
440 Cells were analyzed via flow cytometry, and viable cells that were EpCAM+, CD45-, NS1/2 pAb+, and  
441 NS1 mAb+ were labeled as infected epithelial cells.

442

#### 443 **RNA *in situ* hybridization via RNAscope®**

444 Sections of approximately two cm from the ileum that contained a Peyer's patch (PP) were selected,  
445 cut open lengthwise, pinned apical side up in wax trays, and fixed in 10% neutral-buffered formalin (Sigma)  
446 (18-24h, RT), then moved to 70% EtOH. Tissues were embedded in 2% agar (ThermoFisher), the PP was  
447 vertically transected, flipped 90 degrees, and re-embedded in 2% agar. Agar blocks were maintained in  
448 70% EtOH prior to being paraffin-embedded. Tissue sections (5µm) were cut and maintained at RT with  
449 desiccant until processed. RNA *in situ* hybridization was performed using the RNAscope Multiplex  
450 Fluorescent v2 kit (Advanced Cell Diagnostics [ACDBio], Newark, CA) per protocol guidelines. Probes  
451 were designed by ACDBio for detection of CW3 genomic RNA (471891-C1), CR6 genomic RNA (502631-  
452 C1), and EpCAM mRNA (418151-C2), and signals were amplified and detected via ACDBio protocols  
453 using TSA® plus technology (Perkin Elmer, Waltham, MA). Slides were mounted with ProLong Gold  
454 antifade reagent (ThermoFisher), and imaged using a Zeiss ApoTome2 on an Axio Imager, with a Zeiss  
455 AxioCam 506 (Zeiss, Jena, Germany).

456

#### 457 **Statistical Analyses**

458            Data were analyzed with Prism 7 software (GraphPad Prism Software, La Jolla, CA), with specified  
459 tests and significance noted in the figure legend.

460

461

462 **Acknowledgements:**

463 The authors would like to thank the OHSU Advanced Light Microscopy Core, Flow Cytometry Core, and  
464 Histopathology Shared Resource for technical support, Lena Li for overseeing mouse colonies, Stephanie  
465 Karst for guidance with RNAscope techniques, and Jacob VanWinkle for manuscript review and editing.

466

467 REFERENCES

- 468 1. Ahmed SM, Hall AJ, Robinson AE, Verhoef L, Premkumar P, Parashar UD, et al. Global  
469 prevalence of norovirus in cases of gastroenteritis: a systematic review and meta-analysis. *Lancet*  
470 *Infect Dis.* 2014;14: 725–730. doi:10.1016/S1473-3099(14)70767-4
- 471 2. Glass RI, Parashar UD, Estes MK. Norovirus gastroenteritis. *N Engl J Med.* 2009;361: 1776–1785.  
472 doi:10.1056/NEJMra0804575
- 473 3. Saito M, Goel-Apaza S, Espetia S, Velasquez D, Cabrera L, Loli S, et al. Multiple norovirus  
474 infections in a birth cohort in a Peruvian Periurban community. *Clin Infect Dis.* 2014;58: 483–491.  
475 doi:10.1093/cid/cit763
- 476 4. Teunis PFM, Sukhrie FHA, Vennema H, Bogerman J, Beersma MFC, Koopmans MPG. Shedding  
477 of norovirus in symptomatic and asymptomatic infections. *Epidemiol Infect.* 2015;143: 1710–1717.  
478 doi:10.1017/S095026881400274X
- 479 5. Ettayebi K, Crawford SE, Murakami K, Broughman JR, Karandikar U, Tenge VR, et al.  
480 Replication of human noroviruses in stem cell-derived human enteroids. *Science.* 2016.  
481 doi:10.1126/science.aaf5211
- 482 6. Jones MK, Watanabe M, Zhu S, Graves CL, Keyes LR, Grau KR, et al. Enteric bacteria promote  
483 human and mouse norovirus infection of B cells. *Science.* 2014;346: 755–759.  
484 doi:10.1126/science.1257147
- 485 7. Karst SM, Wobus CE. A working model of how noroviruses infect the intestine. *PLoS Pathog.*  
486 2015;11: e1004626. doi:10.1371/journal.ppat.1004626
- 487 8. Nice TJ, Robinson BA, Van Winkle JA. The Role of Interferon in Persistent Viral Infection:  
488 Insights from Murine Norovirus. *Trends Microbiol.* 2017. doi:10.1016/j.tim.2017.10.010
- 489 9. Baldrige MT, Turula H, Wobus CE. Norovirus Regulation by Host and Microbe. *Trends Mol*  
490 *Med.* 2016;22: 1047–1059. doi:10.1016/j.molmed.2016.10.003
- 491 10. Sosnovtsev SV, Belliot G, Chang K-O, Prikhodko VG, Thackray LB, Wobus CE, et al. Cleavage  
492 map and proteolytic processing of the murine norovirus nonstructural polyprotein in infected cells.  
493 *J Virol.* 2006;80: 7816–7831. doi:10.1128/JVI.00532-06
- 494 11. Karst SM, Wobus CE, Lay M, Davidson J, Virgin HW. STAT1-dependent innate immunity to a  
495 Norwalk-like virus. *Science.* 2003;299: 1575–1578. doi:10.1126/science.1077905
- 496 12. Lambden PR, Caul EO, Ashley CR, Clarke IN. Sequence and genome organization of a human  
497 small round-structured (Norwalk-like) virus. *Science.* 1993;259: 516–519.
- 498 13. McFadden N, Bailey D, Carrara G, Benson A, Chaudhry Y, Shortland A, et al. Norovirus  
499 regulation of the innate immune response and apoptosis occurs via the product of the alternative  
500 open reading frame 4. *PLoS Pathog.* 2011;7: e1002413. doi:10.1371/journal.ppat.1002413
- 501 14. Baker ES, Luckner SR, Krause KL, Lambden PR, Clarke IN, Ward VK. Inherent structural  
502 disorder and dimerisation of murine norovirus NS1-2 protein. *PLoS ONE.* 2012;7: e30534.  
503 doi:10.1371/journal.pone.0030534



- 504 15. Nice TJ, Strong DW, McCune BT, Pohl CS, Virgin HW. A single-amino-acid change in murine  
505 norovirus NS1/2 is sufficient for colonic tropism and persistence. *J Virol.* 2013;87: 327–334.  
506 doi:10.1128/JVI.01864-12
- 507 16. Bailey D, Thackray LB, Goodfellow IG. A single amino acid substitution in the murine norovirus  
508 capsid protein is sufficient for attenuation in vivo. *J Virol.* 2008;82: 7725–7728.  
509 doi:10.1128/JVI.00237-08
- 510 17. Strong DW, Thackray LB, Smith TJ, Virgin HW. Protruding domain of capsid protein is necessary  
511 and sufficient to determine murine norovirus replication and pathogenesis in vivo. *J Virol.* 2012;86:  
512 2950–2958. doi:10.1128/JVI.07038-11
- 513 18. Wilen CB, Lee S, Hsieh LL, Orchard RC, Desai C, Hykes BL, et al. Tropism for tuft cells  
514 determines immune promotion of norovirus pathogenesis. *Science.* 2018;360: 204–208.  
515 doi:10.1126/science.aar3799
- 516 19. Wobus CE, Karst SM, Thackray LB, Chang K-O, Sosnovtsev SV, Belliot G, et al. Replication of  
517 Norovirus in cell culture reveals a tropism for dendritic cells and macrophages. *PLoS Biol.* 2004;2:  
518 e432. doi:10.1371/journal.pbio.0020432
- 519 20. Grau KR, Roth AN, Zhu S, Hernandez A, Colliou N, DiVita BB, et al. The major targets of acute  
520 norovirus infection are immune cells in the gut-associated lymphoid tissue. *Nat Microbiol.* 2017;2:  
521 1586–1591. doi:10.1038/s41564-017-0057-7
- 522 21. Orchard RC, Wilen CB, Doench JG, Baldrige MT, McCune BT, Lee Y-CJ, et al. Discovery of a  
523 proteinaceous cellular receptor for a norovirus. *Science.* 2016. doi:10.1126/science.aaf1220
- 524 22. Haga K, Fujimoto A, Takai-Todaka R, Miki M, Doan YH, Murakami K, et al. Functional receptor  
525 molecules CD300lf and CD300ld within the CD300 family enable murine noroviruses to infect  
526 cells. *Proc Natl Acad Sci USA.* 2016;113: E6248–E6255. doi:10.1073/pnas.1605575113
- 527 23. Hoffmann H-H, Schneider WM, Rice CM. Interferons and viruses: an evolutionary arms race of  
528 molecular interactions. *Trends Immunol.* 2015;36: 124–138. doi:10.1016/j.it.2015.01.004
- 529 24. Nice TJ, Osborne LC, Tomov VT, Artis D, Wherry EJ, Virgin HW. Correction: Type I Interferon  
530 Receptor Deficiency in Dendritic Cells Facilitates Systemic Murine Norovirus Persistence Despite  
531 Enhanced Adaptive Immunity. *PLoS Pathog.* 2016;12: e1005684.  
532 doi:10.1371/journal.ppat.1005684
- 533 25. Thackray LB, Duan E, Lazear HM, Kambal A, Schreiber RD, Diamond MS, et al. Critical role for  
534 interferon regulatory factor 3 (IRF-3) and IRF-7 in type I interferon-mediated control of murine  
535 norovirus replication. *J Virol.* 2012;86: 13515–13523. doi:10.1128/JVI.01824-12
- 536 26. Nice TJ, Baldrige MT, McCune BT, Norman JM, Lazear HM, Artyomov M, et al. Interferon- $\lambda$   
537 cures persistent murine norovirus infection in the absence of adaptive immunity. *Science.*  
538 2015;347: 269–273. doi:10.1126/science.1258100
- 539 27. Baldrige MT, Lee S, Brown JJ, McAllister N, Urbanek K, Dermody TS, et al. Expression of *Ifnlr1*  
540 on Intestinal Epithelial Cells Is Critical to the Antiviral Effects of Interferon Lambda against  
541 Norovirus and Reovirus. *J Virol.* 2017;91. doi:10.1128/JVI.02079-16

- 542 28. Lee S, Wilen CB, Orvedahl A, McCune BT, Kim K-W, Orchard RC, et al. Norovirus Cell Tropism  
543 Is Determined by Combinatorial Action of a Viral Non-structural Protein and Host Cytokine. *Cell*  
544 *Host Microbe*. 2017;22: 449–459.e4. doi:10.1016/j.chom.2017.08.021
- 545 29. Taylor RC, Cullen SP, Martin SJ. Apoptosis: controlled demolition at the cellular level. *Nat Rev*  
546 *Mol Cell Biol*. 2008;9: 231–241. doi:10.1038/nrm2312
- 547 30. Galluzzi L, Brenner C, Morselli E, Touat Z, Kroemer G. Viral control of mitochondrial apoptosis.  
548 *PLoS Pathog*. 2008;4: e1000018. doi:10.1371/journal.ppat.1000018
- 549 31. Polster BM, Pevsner J, Hardwick JM. Viral Bcl-2 homologs and their role in virus replication and  
550 associated diseases. *Biochim Biophys Acta*. 2004;1644: 211–227.  
551 doi:10.1016/j.bbamcr.2003.11.001
- 552 32. Tran AT, Cortens JP, Du Q, Wilkins JA, Coombs KM. Influenza virus induces apoptosis via BAD-  
553 mediated mitochondrial dysregulation. *J Virol*. 2013;87: 1049–1060. doi:10.1128/JVI.02017-12
- 554 33. Tripathi S, Batra J, Cao W, Sharma K, Patel JR, Ranjan P, et al. Influenza A virus nucleoprotein  
555 induces apoptosis in human airway epithelial cells: implications of a novel interaction between  
556 nucleoprotein and host protein Clusterin. *Cell Death Dis*. 2013;4: e562. doi:10.1038/cddis.2013.89
- 557 34. Amara A, Mercer J. Viral apoptotic mimicry. *Nat Rev Microbiol*. 2015;13: 461–469.  
558 doi:10.1038/nrmicro3469
- 559 35. Richard A, Tulasne D. Caspase cleavage of viral proteins, another way for viruses to make the best  
560 of apoptosis. *Cell Death Dis*. 2012;3: e277. doi:10.1038/cddis.2012.18
- 561 36. Mebratu YA, Tipper J, Chand HS, Walton S, Harrod KS, Tesfaigzi Y. Bik Mediates Caspase-  
562 Dependent Cleavage of Viral Proteins to Promote Influenza A Virus Infection. *Am J Respir Cell*  
563 *Mol Biol*. 2016;54: 664–673. doi:10.1165/rcmb.2015-0133OC
- 564 37. Al-Molawi N, Beardmore VA, Carter MJ, Kass GEN, Roberts LO. Caspase-mediated cleavage of  
565 the feline calicivirus capsid protein. *J Gen Virol*. 2003;84: 1237–1244. doi:10.1099/vir.0.18840-0
- 566 38. Cheetham S, Souza M, Meulia T, Grimes S, Han MG, Saif LJ. Pathogenesis of a genogroup II  
567 human norovirus in gnotobiotic pigs. *J Virol*. 2006;80: 10372–10381. doi:10.1128/JVI.00809-06
- 568 39. Troeger H, Loddenkemper C, Schneider T, Schreier E, Epple H-J, Zeitz M, et al. Structural and  
569 functional changes of the duodenum in human norovirus infection. *Gut*. 2009;58: 1070–1077.  
570 doi:10.1136/gut.2008.160150
- 571 40. Mumphrey SM, Changotra H, Moore TN, Heimann-Nichols ER, Wobus CE, Reilly MJ, et al.  
572 Murine norovirus 1 infection is associated with histopathological changes in immunocompetent  
573 hosts, but clinical disease is prevented by STAT1-dependent interferon responses. *J Virol*. 2007;81:  
574 3251–3263. doi:10.1128/JVI.02096-06
- 575 41. Bok K, Prikhodko VG, Green KY, Sosnovtsev SV. Apoptosis in murine norovirus-infected  
576 RAW264.7 cells is associated with downregulation of survivin. *J Virol*. 2009;83: 3647–3656.  
577 doi:10.1128/JVI.02028-08
- 578 42. Furman LM, Maaty WS, Petersen LK, Ettayebi K, Hardy ME, Bothner B. Cysteine protease

- 579 activation and apoptosis in Murine norovirus infection. *Viol J.* 2009;6: 139. doi:10.1186/1743-  
580 422X-6-139
- 581 43. Herod MR, Salim O, Skilton RJ, Prince CA, Ward VK, Lambden PR, et al. Expression of the  
582 murine norovirus (MNV) ORF1 polyprotein is sufficient to induce apoptosis in a virus-free cell  
583 model. *PLoS ONE.* 2014;9: e90679. doi:10.1371/journal.pone.0090679
- 584 44. Chang HY, Yang X. Proteases for cell suicide: functions and regulation of caspases. *Microbiol Mol*  
585 *Biol Rev.* 2000;64: 821–846.
- 586 45. Hyde JL, Sosnovtsev SV, Green KY, Wobus C, Virgin HW, Mackenzie JM. Mouse norovirus  
587 replication is associated with virus-induced vesicle clusters originating from membranes derived  
588 from the secretory pathway. *J Virol.* 2009;83: 9709–9719. doi:10.1128/JVI.00600-09
- 589 46. Hyde JL, Mackenzie JM. Subcellular localization of the MNV-1 ORF1 proteins and their potential  
590 roles in the formation of the MNV-1 replication complex. *Virology.* 2010;406: 138–148.  
591 doi:10.1016/j.virol.2010.06.047
- 592 47. Doerflinger SY, Cortese M, Romero-Brey I, Menne Z, Tubiana T, Schenk C, et al. Membrane  
593 alterations induced by nonstructural proteins of human norovirus. *PLoS Pathog.* 2017;13:  
594 e1006705. doi:10.1371/journal.ppat.1006705
- 595 48. McCune BT, Tang W, Lu J, Eaglesham JB, Thorne L, Mayer AE, et al. Noroviruses Co-opt the  
596 Function of Host Proteins VAPA and VAPB for Replication via a Phenylalanine-Phenylalanine-  
597 Acidic-Tract-Motif Mimic in Nonstructural Viral Protein NS1/2. *MBio.* 2017;8.  
598 doi:10.1128/mBio.00668-17
- 599 49. Ettayebi K, Hardy ME. Norwalk virus nonstructural protein p48 forms a complex with the SNARE  
600 regulator VAP-A and prevents cell surface expression of vesicular stomatitis virus G protein. *J*  
601 *Virol.* 2003;77: 11790–11797.
- 602 50. Feng Z, Hensley L, McKnight KL, Hu F, Madden V, Ping L, et al. A pathogenic picornavirus  
603 acquires an envelope by hijacking cellular membranes. *Nature.* 2013;496: 367–371.  
604 doi:10.1038/nature12029
- 605 51. Chen Y-H, Du W, Hagemeyer MC, Takvorian PM, Pau C, Cali A, et al. Phosphatidylserine  
606 vesicles enable efficient en bloc transmission of enteroviruses. *Cell.* 2015;160: 619–630.  
607 doi:10.1016/j.cell.2015.01.032
- 608 52. Bhattacharyya S, Zagórska A, Lew ED, Shrestha B, Rothlin CV, Naughton J, et al. Enveloped  
609 viruses disable innate immune responses in dendritic cells by direct activation of TAM receptors.  
610 *Cell Host Microbe.* 2013;14: 136–147. doi:10.1016/j.chom.2013.07.005
- 611 53. Gerbe F, Legraverend C, Jay P. The intestinal epithelium tuft cells: specification and function. *Cell*  
612 *Mol Life Sci.* 2012;69: 2907–2917. doi:10.1007/s00018-012-0984-7
- 613 54. Delgado ME, Grabinger T, Brunner T. Cell death at the intestinal epithelial front line. *FEBS J.*  
614 2016;283: 2701–2719. doi:10.1111/febs.13575
- 615 55. Reginato MJ, Mills KR, Paulus JK, Lynch DK, Sgroi DC, Debnath J, et al. Integrins and EGFR  
616 coordinately regulate the pro-apoptotic protein Bim to prevent anoikis. *Nat Cell Biol.* 2003;5: 733–

- 617 740. doi:10.1038/ncb1026
- 618 56. Hausmann M, Leucht K, Ploner C, Kiessling S, Villunger A, Becker H, et al. BCL-2 modifying  
619 factor (BMF) is a central regulator of anoikis in human intestinal epithelial cells. *J Biol Chem.*  
620 2011;286: 26533–26540. doi:10.1074/jbc.M111.265322
- 621 57. Youle RJ, Strasser A. The BCL-2 protein family: opposing activities that mediate cell death. *Nat*  
622 *Rev Mol Cell Biol.* 2008;9: 47–59. doi:10.1038/nrm2308
- 623 58. Poon IKH, Lucas CD, Rossi AG, Ravichandran KS. Apoptotic cell clearance: basic biology and  
624 therapeutic potential. *Nat Rev Immunol.* 2014;14: 166–180. doi:10.1038/nri3607
- 625 59. Lee CS, Penberthy KK, Wheeler KM, Juncadella IJ, Vandenabeele P, Lysiak JJ, et al. Boosting  
626 Apoptotic Cell Clearance by Colonic Epithelial Cells Attenuates Inflammation In Vivo. *Immunity.*  
627 2016;44: 807–820. doi:10.1016/j.immuni.2016.02.005
- 628 60. Juncadella IJ, Kadl A, Sharma AK, Shim YM, Hochreiter-Hufford A, Borish L, et al. Apoptotic  
629 cell clearance by bronchial epithelial cells critically influences airway inflammation. *Nature.*  
630 2013;493: 547–551. doi:10.1038/nature11714
- 631 61. Monks J, Rosner D, Geske FJ, Lehman L, Hanson L, Neville MC, et al. Epithelial cells as  
632 phagocytes: apoptotic epithelial cells are engulfed by mammary alveolar epithelial cells and repress  
633 inflammatory mediator release. *Cell Death Differ.* 2005;12: 107–114. doi:10.1038/sj.cdd.4401517
- 634 62. Blasi E, Barluzzi R, Bocchini V, Mazzolla R, Bistoni F. Immortalization of murine microglial cells  
635 by a v-raf/v-myc carrying retrovirus. *J Neuroimmunol.* 1990;27: 229–237.
- 636 63. Qin Z, Noffz G, Mohaupt M, Blankenstein T. Interleukin-10 prevents dendritic cell accumulation  
637 and vaccination with granulocyte-macrophage colony-stimulating factor gene-modified tumor  
638 cells. *J Immunol.* 1997;159: 770–776.

639

640

641

642

643

644

645

646

647

648

## 649 **Figure Legends**

650 **Fig 1. MNV NS1/2 is cleaved by host caspases at late times-post-infection.** (A) Schematic of MNV  
651 genomic organization, illustrating initial NS1/2 expression within the ORF1 polyprotein. Cleavage sites in  
652 ORF1 are marked accordingly - sites cleaved by the viral protease (v) and sites cleaved by host caspases  
653 (\*), the latter at aspartic acid residues 121 and 131 within the 2 functional caspase motifs, DKAD<sup>121</sup> and  
654 DAMD<sup>131</sup> [10]. (B) Schematic representation of the five MNV clones used in these studies. Clones with  
655 D<sub>121</sub>G and D<sub>131</sub>G mutations are referred to as Δcasp, and indicated by the X. (C) BV2 cells were infected  
656 with indicated strains of MNV (MOI=1), and whole cell extracts (WCE) were analyzed via western blot  
657 (WB) at indicated times post-infection. Image is representative of 4 independent experiments. Arrows are  
658 pointing to the full-length NS1/2 at ~45kD, and NS2 at ~28kD. \* Denotes a non-specific band at ~30kD.  
659 (D) BV2 cells were infected as in C, but subsequently treated with 50uM ZVAD-fmk at 10hpi, and WCE  
660 were analyzed via WB. Image is representative of 3 independent experiments. SS, staurosporine.

661

662 **Fig 2. Cleavage of NS1/2 is not required for MNV replication *in vitro*.** (A, B) BV2 cells were infected  
663 with the indicated strain of MNV (MOI=1) and infectious virus was analyzed at indicated times post-  
664 infection via plaque assay. Data are an average of 3 independent experiments. WT (C, D) or *Stat1*<sup>-/-</sup> (E, F)  
665 BMDCs were generated as described in methods, and infected and analyzed as in A-B. Data are an average  
666 of 2 independent experiments. Dotted lines indicate limit of detection. Statistical significance was  
667 determined via two-way ANOVA with Bonferroni's multiple comparisons test. \*, p ≤ 0.05. BMDCs, bone  
668 marrow-derived dendritic cells.

669

670 **Fig 3. Cleavage of NS1/2 is specifically required for early replication in intestinal tissues.** WT B6  
671 mice were perorally infected with indicated viruses (1e6 PFU). At 3 days post-infection (dpi), tissues (A,  
672 B) and stool (C, D) were harvested and analyzed via plaque assay. Data are from 8-9 individual mice within  
673 3 separate experiments, and mean values are indicated. (E-H) Peyer's patches within the ileum were

674 analyzed via RNA *in situ* hybridization, using RNAscope commercial protocols and probes. MNV genomic  
675 RNA was probed within ORF2, which encodes the major capsid (VP1), and is labeled in magenta, epithelial  
676 cells were probed via EpCAM, and labeled in green, and DAPI is labeling nuclei in blue. Images are  
677 representative of 2-3 mice for each group. (I) Mice (5-6 per group) were infected with indicated virus and  
678 survival was plotted over the course of 35 days. Statistical significance was determined via Mann-Whitney  
679 test for A-D. \*,  $p \leq 0.05$ ; \*\*,  $p \leq 0.01$ ; ns, not significant; MLN, mesenteric lymph node; yellow scale  
680 bar, 50 $\mu$ m; white scale bar, 20  $\mu$ m.

681

682 **Fig 4. Cleavage of NS1/2 is critical for persistent infection in the intestine.** (A, B) WT B6 mice were  
683 perorally infected with indicated viruses, sacrificed at 21 days post-infection (dpi), and indicated tissues  
684 were analyzed via RT-qPCR for MNV genomic RNA. Data are combined from 2 separate experiments  
685 with data points representing individual mice, and mean values are indicated. (C, D) Fecal pellets were  
686 also collected at 21 dpi, and similarly analyzed. Statistical significance was determined via Mann-Whitney  
687 test. \*,  $p \leq 0.05$ ; \*\*,  $p \leq 0.01$ ; ns, not significant; MLN, mesenteric lymph node.

688

689 **Fig 5. Caspase cleavage of NS1/2 is required independent of the IFN- $\lambda$  response.** WT (A, C) or *Ifnlr*  
690 <sup>-/-</sup> (B, D) mice were infected by oral gavage with either 1e6 PFU or 1e7 PFU, as indicated. Fecal samples  
691 (A, B) were collected at 3, 7, 14, and 21 days post-infection (dpi), and colon tissue (C, D) was harvested at  
692 21dpi. All samples were analyzed via RT-qPCR, and the mean of each group (N=4) is indicated. Dotted  
693 lines indicate limit of detection.

694

695 **Fig 6. NS1/2 cleavage is necessary for infection of intestinal epithelial cells.** (A-C) Littermate mice  
696 deficient for the type III IFN receptor (*Ifnlr1*<sup>-/-</sup> or *Ifnlr1*<sup>-/-</sup>/*Ifnar*<sup>+/-</sup>, “LRKO”), deficient for both type I and  
697 III IFN receptors (*Ifnlr1*<sup>-/-</sup>/*Ifnar*<sup>-/-</sup>, “DKO”), and matched receptor-sufficient controls (*Ifnlr1*<sup>+/+</sup> / *Ifnar*<sup>+/+</sup> or  
698 *Ifnlr1*<sup>+/-</sup>/*Ifnar*<sup>+/-</sup>, “WT”) were infected with indicated viruses (9-13 mice per group combined from 3 separate

699 experiments), and analyzed at 3 dpi. (A) Peyer's patches were collected and analyzed via RT-qPCR for  
700 MNV genomic RNA and normalized to RPS29. (B, C) Intestinal epithelial cells (CD45-, EpCAM+) were  
701 collected and doubly stained for NS1/2 as described in methods. Dotted line indicates limit of detection.  
702 (C) Flow plots representing data from 5 mice in B (each mouse is a separate color). (D-F) Ileum tissue  
703 from CR6-infected or CR6 $\Delta$ casp-infected WT mice was analyzed via RNAscope at 3 dpi, as in Figure 3.  
704 MNV RNA is in magenta, EpCAM is in green, and nuclei are stained with DAPI in blue. Images are  
705 representative of 5 mice infected with each virus. white scale bar, 20 $\mu$ m. Legend refers to data in A and  
706 B. Statistical significance was determined by Mann-Whitney test. \*,  $p \leq 0.05$ .

707

708 **Fig 7. Cleavage of NS1/2 potentiates apoptotic cell death.** BV2 cells were infected (MOI=1) with  
709 indicated MNV strains, and (A-D) whole cell extracts were collected at indicated times and analyzed via  
710 WB for caspase 3, PARP, actin, and MNV ProPol. (A, D) Arrows denote cleaved fragments of caspase 3  
711 and PARP, indicating activation. Images are representative of 3 independent experiments. Cleaved caspase  
712 3 (B), and ProPol (normalized to actin) (C) were analyzed via densitometry, with average and SD shown.  
713 (E-H) Cells were harvested at 14h and 17hpi, stained with Annexin V and zombie LIVE/DEAD viability  
714 stain, and analyzed via flow cytometry. (E) Representative flow plots are shown from one of six  
715 independent experiments. (F) Total Annexin V+ cells were averaged at 17hpi, and individual and mean  
716 values are indicated, and (G) live, Annexin V+ (bottom right quadrant of flow plots in E), and (H) dead,  
717 Annexin V+ (top right quadrant of flow plots in E) populations were also analyzed separately. Statistical  
718 significance was determined by repeated measures one-way ANOVA, with Bonferroni's multiple  
719 comparison test. \*,  $p \leq 0.05$ ; \*\*,  $p \leq 0.01$ ; ns, not significant. SS, staurosporine.

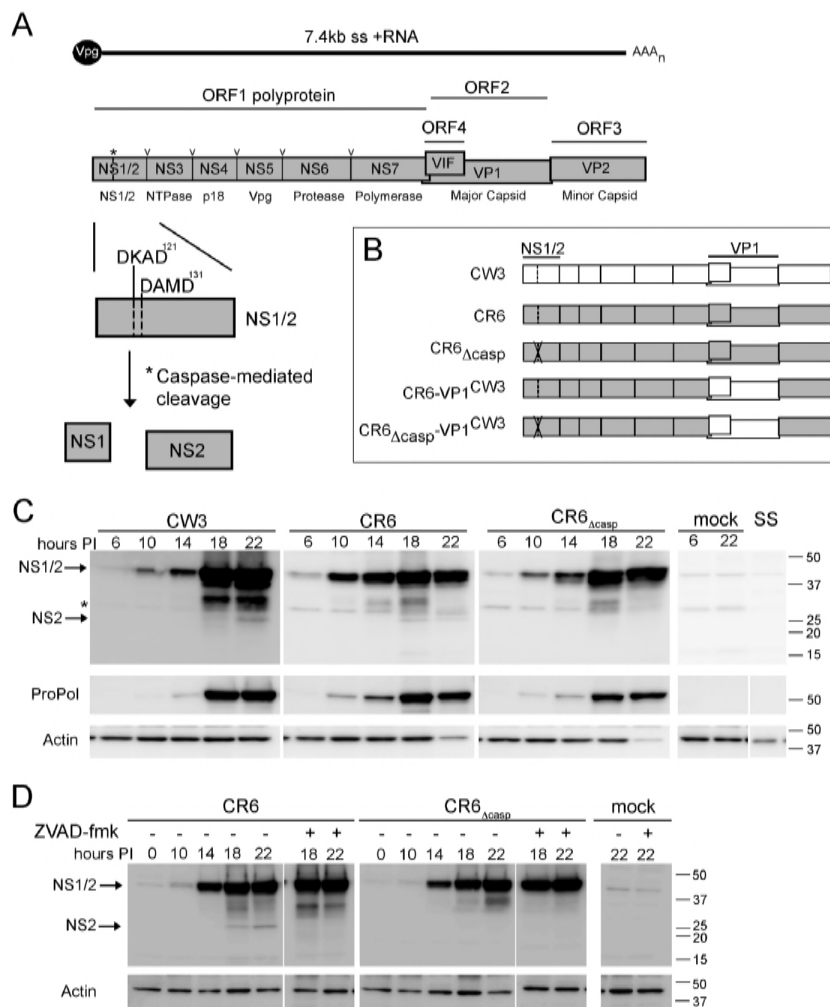



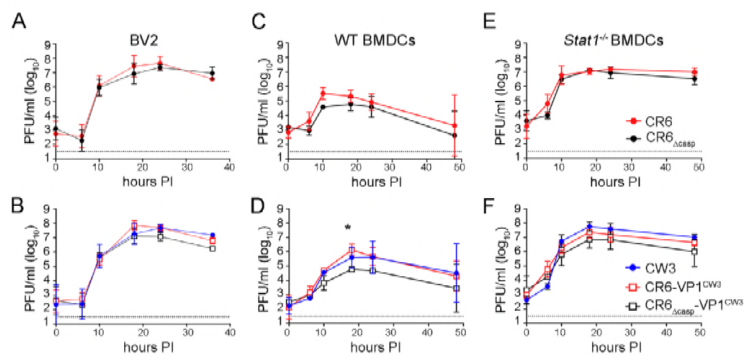

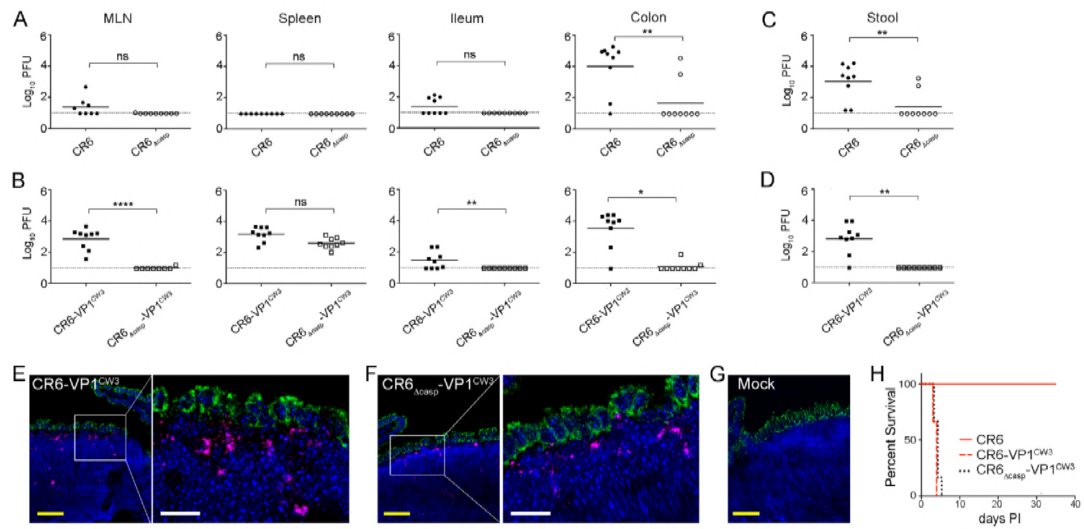

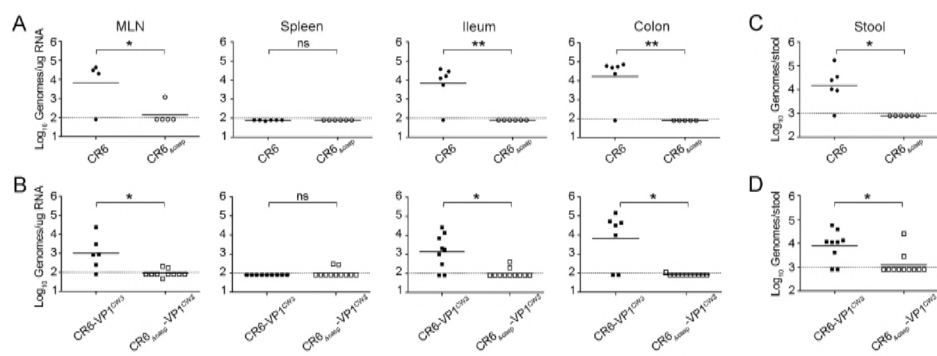

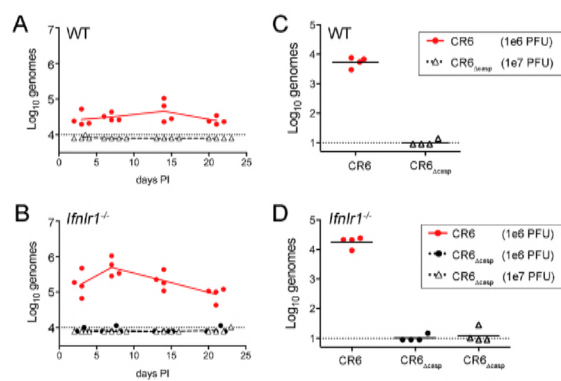

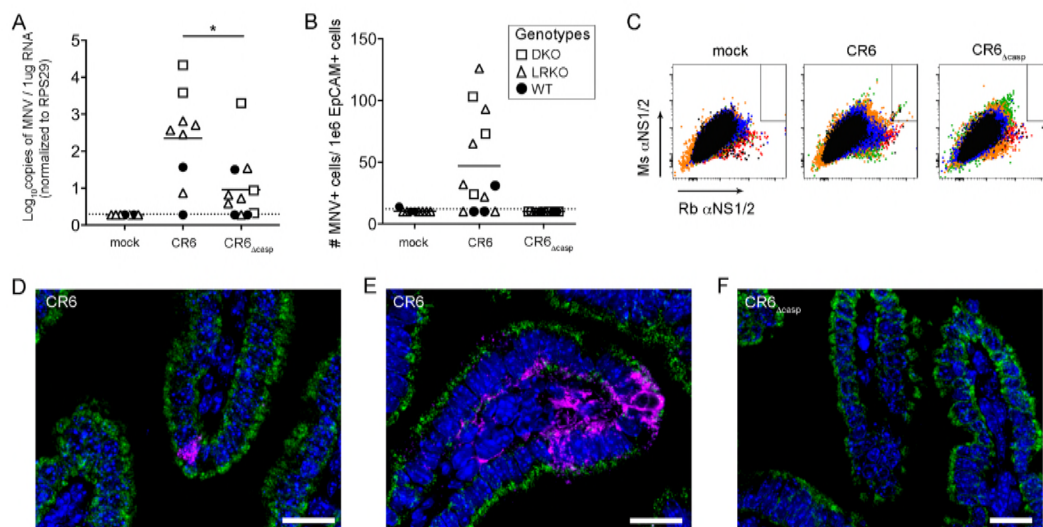

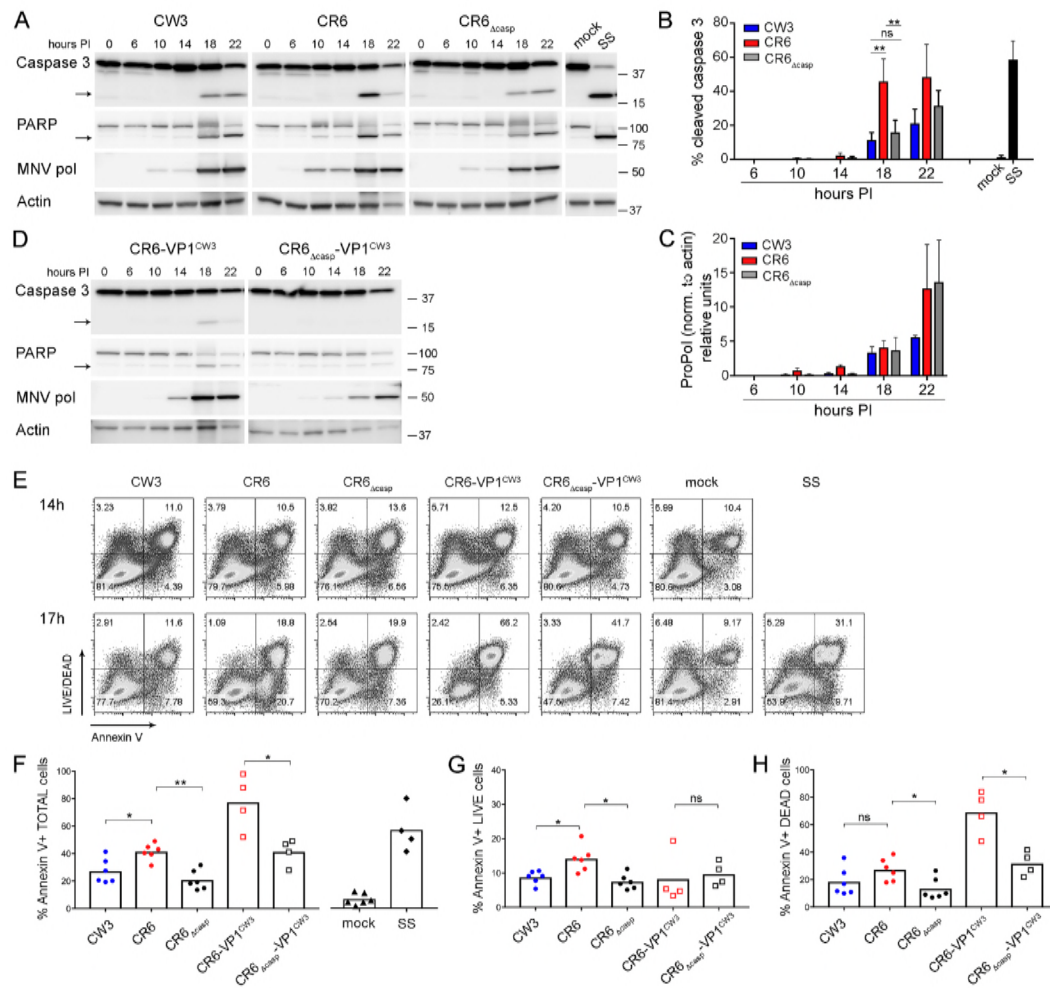

Source: http://biorxiv.org/content/10.1101/372615v1.full.pdf
